# Supplementary material
Source: publisher figshare collection journal article supplement (https://karger.figshare.com/articles/dataset/_/13116899)
Supplement: Supplementary file 1 [file 1]

**Supplementary Table S2: Medication of recruited patients at the time of bariatric surgery.**

| Internal patient no. | NASH | Medication                                                                                                   |
|----------------------|------|--------------------------------------------------------------------------------------------------------------|
| 1                    | No   | Omeprazole                                                                                                   |
| 2                    | No   | L-Thyroxine                                                                                                  |
| 3                    | No   | no medication                                                                                                |
| 4                    | No   | no medication                                                                                                |
| 5                    | No   | Fluoxetine, acetylsalicylic acid, Pantoprazole                                                               |
| 6                    | No   | no medication                                                                                                |
| 7                    | No   | no medication                                                                                                |
| 8                    | No   | Oxycodone ret., Metamizole, Carbamazepine, Nortriptyline, Pantoprazole, L-Thyroxine, Cryproterone, Rituximab |
| 9                    | No   | no medication                                                                                                |
| 10                   | No   | no medication                                                                                                |
| 11                   | No   | no medication                                                                                                |
| 12                   | No   | Metoprolol, Pantoprazole                                                                                     |
| 13                   | No   | no medication                                                                                                |
| 14                   | No   | Pantoprazole                                                                                                 |
| 15                   | No   | Fluoxetine, Trimipramine                                                                                     |
| 16                   | No   | Pantoprazole                                                                                                 |
| 17                   | No   | no medication                                                                                                |
| 18                   | No   | no medication                                                                                                |
| 19                   | No   | unknown                                                                                                      |
| 20                   | No   | no medication                                                                                                |
| 21                   | No   | Bisoprolol, Febuxostat, Candesartan, Rivaroxaban, Insulin, Liraglutide, Simvastatin, Omeprazole              |
| 22                   | Yes  | no medication                                                                                                |
| 23                   | Yes  | Venlafaxine, Torasemide, Thyroxine, Pantoprazole                                                             |
| 24                   | Yes  | no medication                                                                                                |
| 25                   | Yes  | Esomeprazole                                                                                                 |
| 26                   | Yes  | Pantoprazole                                                                                                 |
| 27                   | Yes  | Metformin, Insulin, Ramipril                                                                                 |
| 28                   | Yes  | no medication                                                                                                |
| 29                   | Yes  | no medication                                                                                                |
| 30                   | Yes  | Torasemide, L-Thyroxine, Pantoprazole, oral contraceptives                                                   |
| 31                   | Yes  | no medication                                                                                                |
| 32                   | Yes  | no medication                                                                                                |
| 33                   | Yes  | no medication                                                                                                |
| 34                   | Yes  | no medication                                                                                                |
| 35                   | Yes  | no medication                                                                                                |
| 36                   | Yes  | L-Thyroxine, Metoprolol, Pantoprazole, Alendronic acid                                                       |
| 37                   | Yes  | no medication                                                                                                |
| 38                   | Yes  | no medication                                                                                                |
| 39                   | Yes  | L-Thyroxine, Paroxetine, Esomeprazole                                                                        |
| 40                   | Yes  | no medication                                                                                                |
| 41                   | Yes  | no medication                                                                                                |
| 42                   | Yes  | no medication                                                                                                |
| 43                   | Yes  | Torasemide, Omeprazole, Metoprolol, Ramipril, Formoterol, Glimepiride, Salbutamol                            |
| 44                   | Yes  | Pantoprazole                                                                                                 |
| 45                   | Yes  | no medication                                                                                                |
| 46                   | Yes  | Pantoprazole, Bisoprolol                                                                                     |
